# Supplementary figures and images for: Novelties in Fuscosporellaceae (Fuscosporellales): Two New Parafuscosporella from Thailand Revealed by Morphology and Phylogenetic Analyses
Source: MDPI journal article supplement (doi:10.3390/d13110517), 2021-10-22

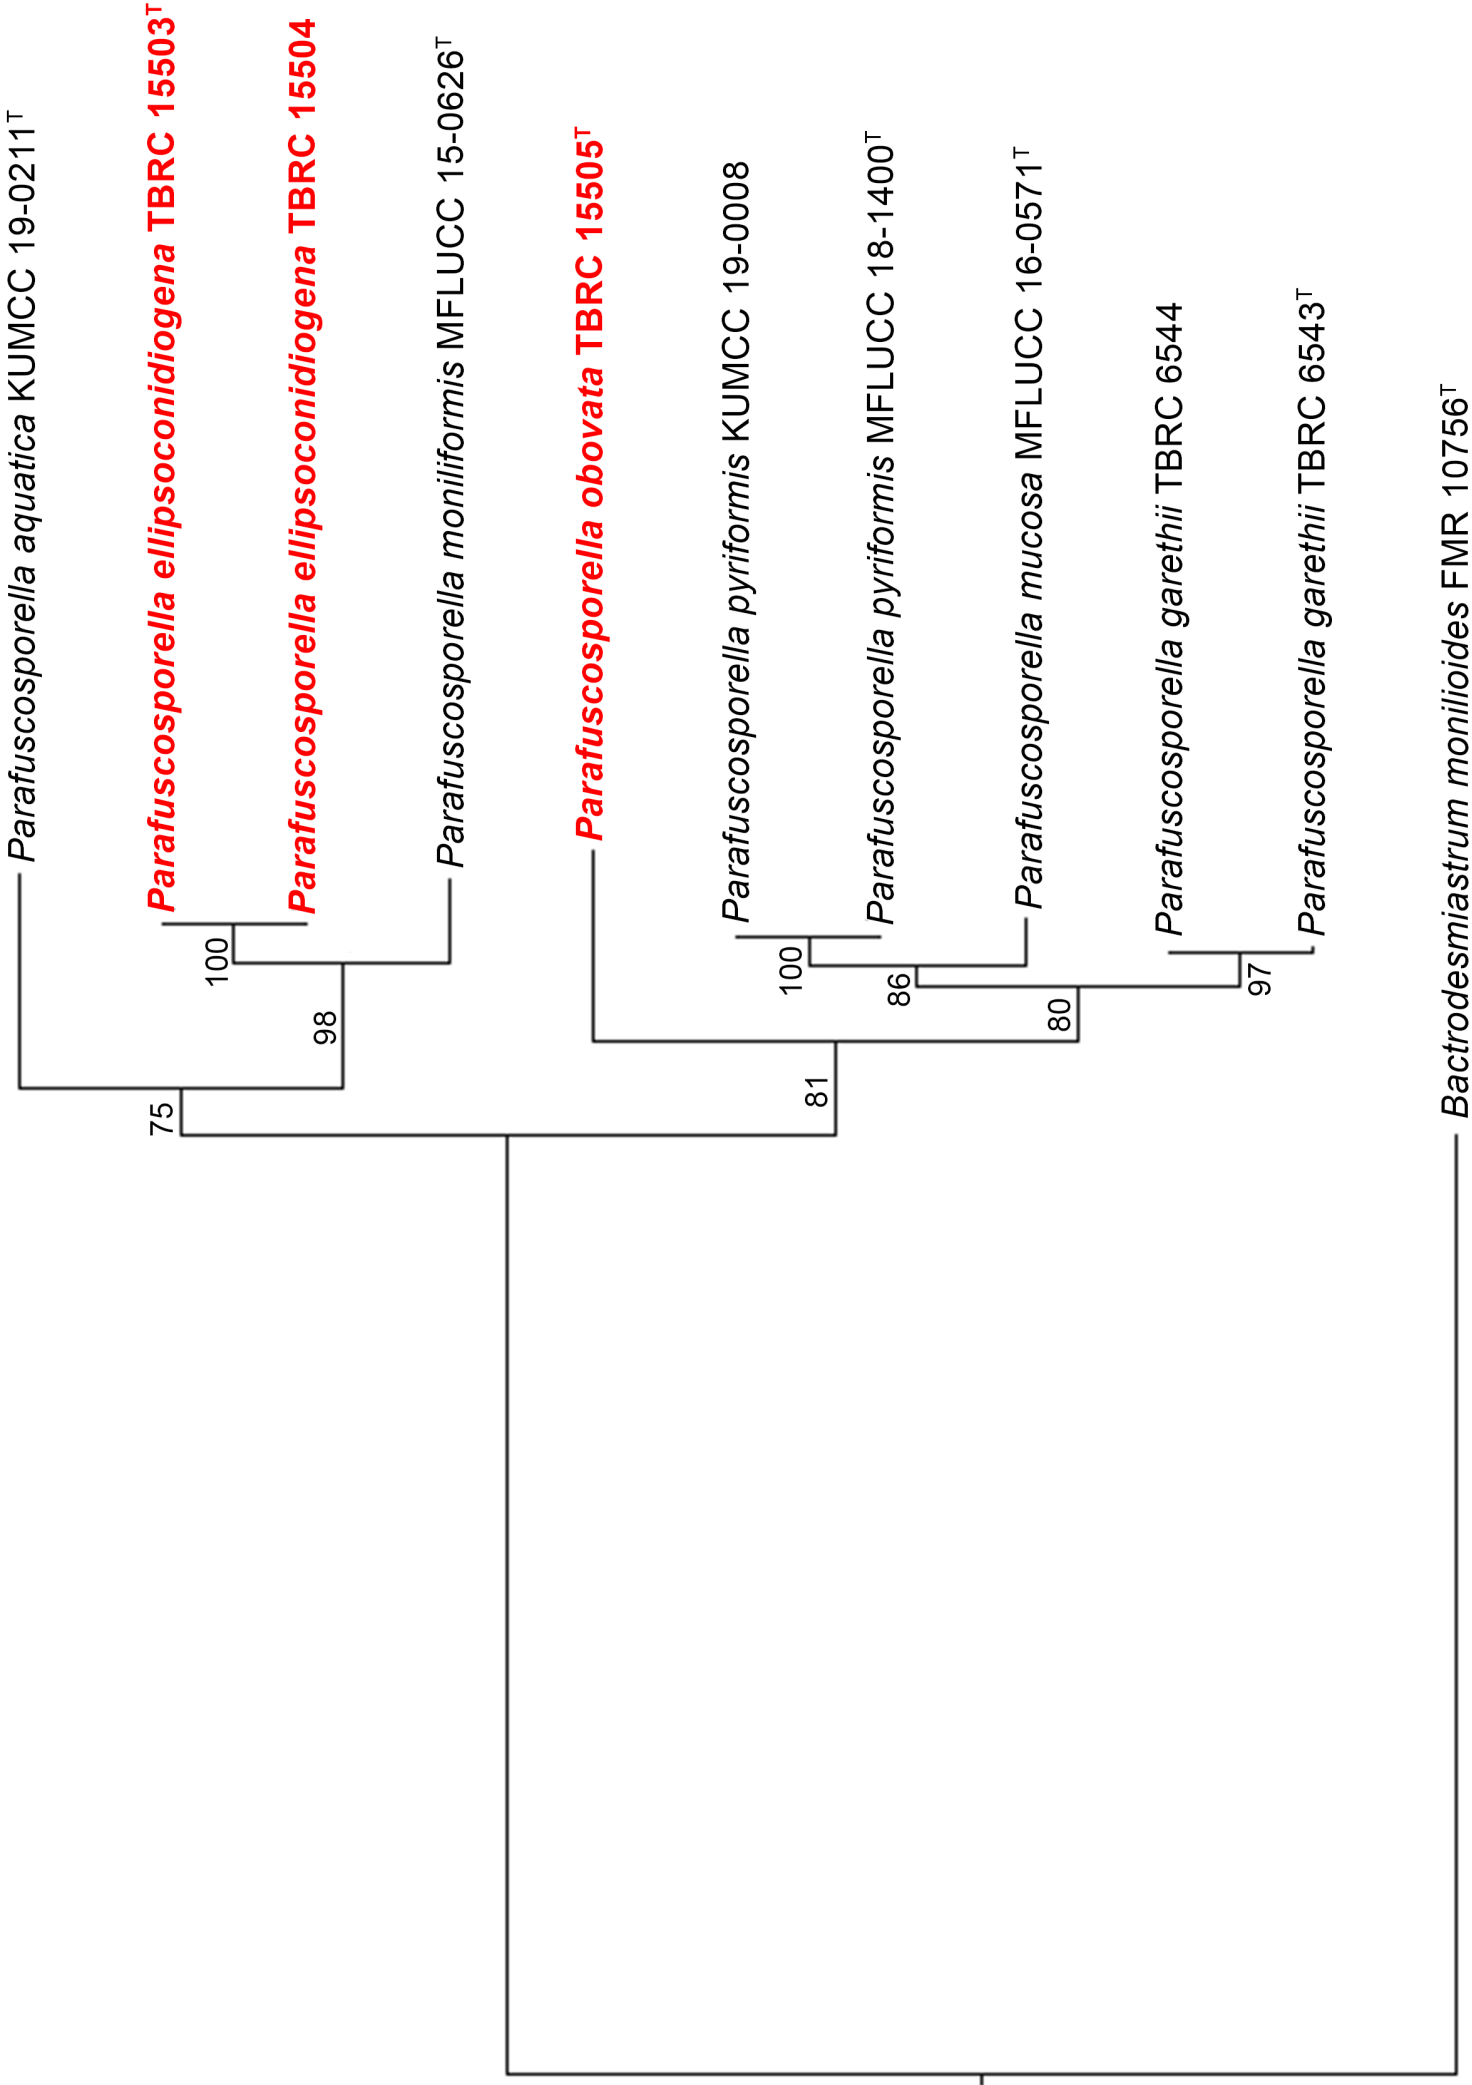

Supplement: s1 [file s1]

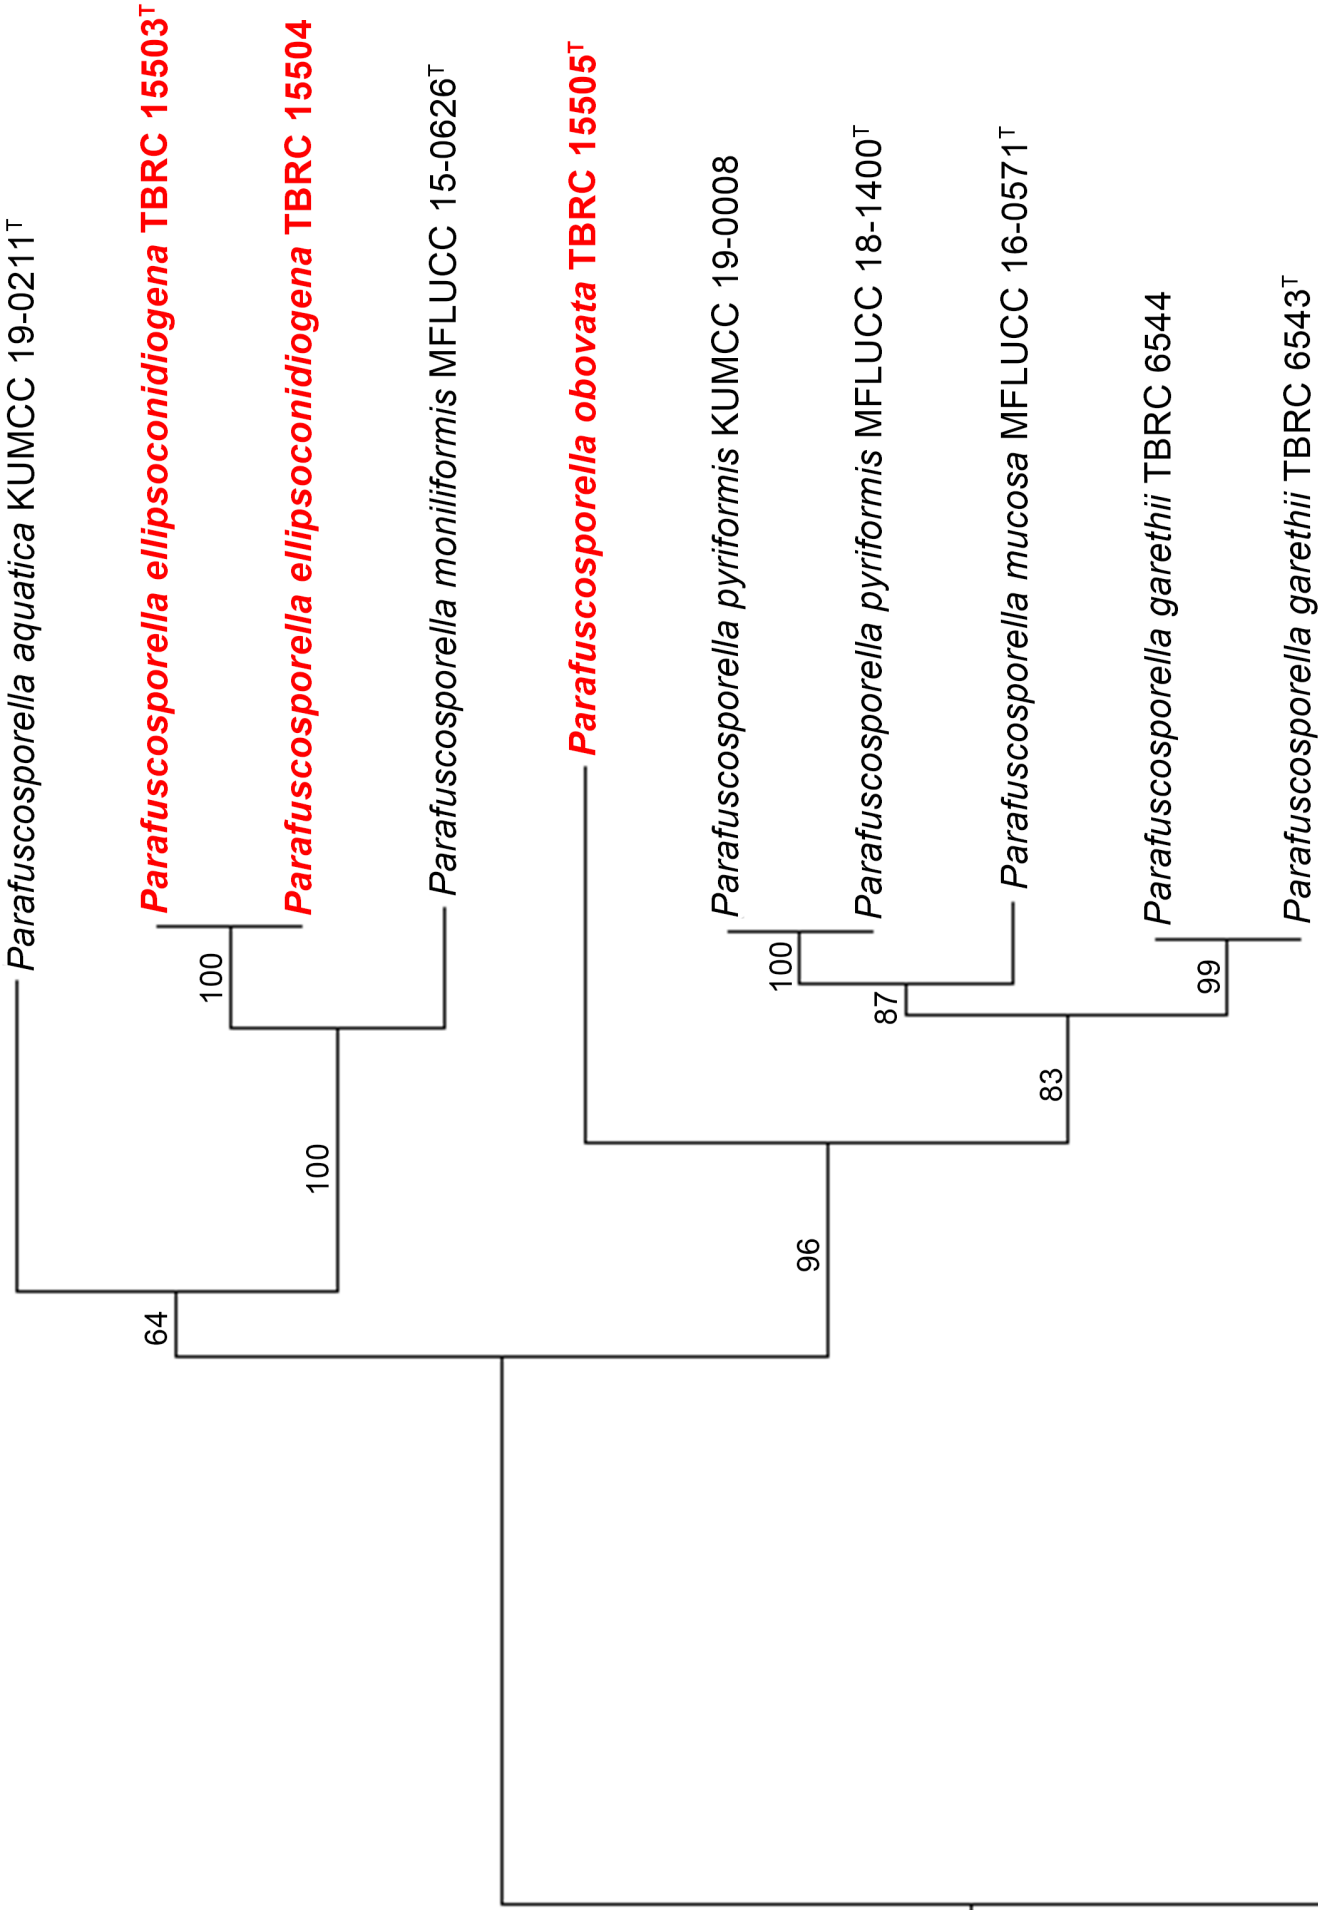

Supplement: s1 [file s1]
